# Supplementary material for: Transcriptome changes and cAMP oscillations in an archaeal cell cycle
Source: PubMed Central journal article supplement (PMC1906763; doi:10.1186/1471-2121-8-21), 2007-06-11
Supplement: 1471-2121-8-21-S2.pdf [file 1471-2121-8-21-S2.pdf]

| primer name         | sequence               | target gene                                                                        | length of probe | hybridization temperature |
|---------------------|------------------------|------------------------------------------------------------------------------------|-----------------|---------------------------|
| OE4345R_Sonde1F     | GAAGAGGTGGCGATGCAAGG   | ribonucleoside-diphosphate reductase (EC 1.17.4.1) beta chain                      | 398bp           | 50°C                      |
| OE4345R_Sonde1R     | ACGAGATCCCGCAGGAAGTC   |                                                                                    |                 |                           |
| OE4304R_Sonde1F     | CGTGCGATGCCGAATTCTG    | ABC-type transport system permease protein                                         | 448bp           | 55°C                      |
| OE4304R_Sonde1R     | AGCCGCCGATGAGCAAGTAG   |                                                                                    |                 |                           |
| OE2019F_Sonde1F     | AGTCGAGATGGCCGAGGAGTTC | fructose-bisphosphate aldolase (EC 4.1.2.13) 1                                     | 300bp           | 50°C                      |
| OE2019F_Sonde1R     | CGATTGCGCCCTTCACGGATTC |                                                                                    |                 |                           |
| OE3571R_Sonde1F     | TCGTGCAGGGCACCATCTAC   | GMP synthase (glutamine-hydrolyzing) (EC 6.3.5.2), subunit B                       | 260bp           | 50°C                      |
| OE3571R_Sonde1R     | ACAGACCGCGACCTTCTCAG   |                                                                                    |                 |                           |
| OE1414R_Sonde1F     | TGACGAGGGCGGCATCTATC   | cell division protein <i>ftsZ4</i>                                                 | 373bp           | 50°C                      |
| OE1414R_Sonde1R     | GGTCTGTGGCACGCTCATTC   |                                                                                    |                 |                           |
| OE4419Sonde1F       | GCCGTGATTCCTGCTGGAG    | argininosuccinate lyase (EC 4.3.2.1)                                               | 164bp           | 45°C                      |
| OE4419Sonde1R       | GTCCGGTTCTTCTTCTGGG    |                                                                                    |                 |                           |
| OE4676 HP F Sonde_1 | GCACAGACTTCGGACGACTC   | hypothetical protein                                                               | 150bp           | 45°C                      |
| OE4676 HP R Sonde_1 | GCCACAGACTGTGCAGGTTC   |                                                                                    |                 |                           |
| SIR R Sonde_1 F     | TGGCGACCCATCTGGACTAC   | transcription regulator <i>sirR</i>                                                | 310bp           | 45°C                      |
| SIR R Sonde_1R      | TGCTCGGTGACCGTGAGTTC   |                                                                                    |                 |                           |
| ORC 7 Sonde_1F      | AAGACGGGCACCGAAAGAC    | cell division control protein <i>cdc6</i> homolog                                  | 310bp           | 45°C                      |
| ORC 7 Sonde_1R      | CGAAACATCGGAGCCCTCAC   |                                                                                    |                 |                           |
| OE 1679 Sonde_1 F   | GGTTCGCCAACCATTCTGC    | probable ABC-type phosphate transport system periplasmic phosphate-binding protein | 400bp           | 45°C                      |
| OE 1679 Sonde_1 R   | TGGATGATGGTCCGGTCCTG   |                                                                                    |                 |                           |
| hp24 F Sonde1       | GACGGACCACTGCTGTAAG    | conserved hypothetical protein                                                     | 800bp           | 50°C                      |
| hp24 R Sonde1       | CTCGACAGATGAACCCACG    |                                                                                    |                 |                           |
| Sph1 F Sonde1       | GCTTCGCGTTGTTTCGATC    | SMC-like protein <i>sph1</i>                                                       | 1050bp          | 55°C                      |
| Sph1 R Sonde1       | TGGAGAACGAAGACGACGG    |                                                                                    |                 |                           |
| Sph2 Sonde1 F       | CAGAGCGTCGTGACTTGG     | SMC-like protein <i>sph2</i>                                                       | 716bp           | 50°C                      |
| Sph2 Sonde1 R       | GCTGTGATTCACGCAGTTCC   |                                                                                    |                 |                           |
